# Supplementary material for: Epidemiology of cerebral venous sinus thrombosis and cerebral venous sinus thrombosis with thrombocytopenia in the United States, 2018 and 2019
Source: PubMed Central journal article supplement — Res Pract Thromb Haemost. 2022 Mar 7;6(2):e12682. doi: 10.1002/rth2.12682 (PMC8901465; doi:10.1002/rth2.12682), 2022-03-07
Supplement: RTH2-6-e12682-s001.pdf [file RTH2-6-e12682-s001.pdf]

**Supplementary Material**

**Supplemental Table 1: International Classification of Disease, 10<sup>th</sup> Revision, Clinical Modification codes used to define cerebral venous sinus thrombosis (CVST), thrombocytopenia, and relevant comorbidities**

| Condition                               | ICD-10-CM Codes                                                                                                                                                                                                                                                                                                                                                                                                                                                                                                                                                                                                                                                                                                                                                                                                                                                                                                                                                                                                                                                                                                                                                                                                                                                                                                                                                                                                                                                                                                                                                                                                                                                            |
|-----------------------------------------|----------------------------------------------------------------------------------------------------------------------------------------------------------------------------------------------------------------------------------------------------------------------------------------------------------------------------------------------------------------------------------------------------------------------------------------------------------------------------------------------------------------------------------------------------------------------------------------------------------------------------------------------------------------------------------------------------------------------------------------------------------------------------------------------------------------------------------------------------------------------------------------------------------------------------------------------------------------------------------------------------------------------------------------------------------------------------------------------------------------------------------------------------------------------------------------------------------------------------------------------------------------------------------------------------------------------------------------------------------------------------------------------------------------------------------------------------------------------------------------------------------------------------------------------------------------------------------------------------------------------------------------------------------------------------|
| Cerebral Venous Sinus Thrombosis (CVST) | I676', 'I636', 'O2250', 'O2251', 'O2252', 'O2253', 'O873', 'G08'                                                                                                                                                                                                                                                                                                                                                                                                                                                                                                                                                                                                                                                                                                                                                                                                                                                                                                                                                                                                                                                                                                                                                                                                                                                                                                                                                                                                                                                                                                                                                                                                           |
| Thrombocytopenia                        | D693', 'D6941', 'D6942', 'D6949', 'D6951', 'D6959', 'D696', 'D7582', 'P610'                                                                                                                                                                                                                                                                                                                                                                                                                                                                                                                                                                                                                                                                                                                                                                                                                                                                                                                                                                                                                                                                                                                                                                                                                                                                                                                                                                                                                                                                                                                                                                                                |
| Hemorrhagic Stroke                      | I6000', 'I6001', 'I6002', 'I6010', 'I6011', 'I6012', 'I602', 'I6020', 'I6021', 'I6022', 'I6030', 'I6031', 'I6032', 'I604', 'I6050', 'I6051', 'I6052', 'I606', 'I607', 'I608', 'I609', 'I610', 'I611', 'I612', 'I613', 'I614', 'I615', 'I616', 'I618', 'I619', 'I6200', 'I6201', 'I6202', 'I6203', 'I621', 'I629', 'I6900', 'I6901', 'I69010', 'I69011', 'I69012', 'I69013', 'I69014', 'I69015', 'I69018', 'I69019', 'I69020', 'I69021', 'I69022', 'I69023', 'I69028', 'I69031', 'I69032', 'I69033', 'I69034', 'I69039', 'I69041', 'I69042', 'I69043', 'I69044', 'I69049', 'I69051', 'I69052', 'I69053', 'I69054', 'I69059', 'I69061', 'I69062', 'I69063', 'I69064', 'I69065', 'I69069', 'I69090', 'I69091', 'I69092', 'I69093', 'I69098', 'I6910', 'I6911', 'I69110', 'I69111', 'I69112', 'I69113', 'I69114', 'I69115', 'I69118', 'I69119', 'I69120', 'I69121', 'I69122', 'I69123', 'I69128', 'I69131', 'I69132', 'I69133', 'I69134', 'I69139', 'I69141', 'I69142', 'I69143', 'I69144', 'I69149', 'I69151', 'I69152', 'I69153', 'I69154', 'I69159', 'I69161', 'I69162', 'I69163', 'I69164', 'I69165', 'I69169', 'I69190', 'I69191', 'I69192', 'I69193', 'I69198', 'I6920', 'I6921', 'I69210', 'I69211', 'I69212', 'I69213', 'I69214', 'I69215', 'I69218', 'I69219', 'I69220', 'I69221', 'I69222', 'I69223', 'I69228', 'I69231', 'I69232', 'I69233', 'I69234', 'I69239', 'I69241', 'I69242', 'I69243', 'I69244', 'I69249', 'I69251', 'I69252', 'I69253', 'I69254', 'I69259', 'I69261', 'I69262', 'I69263', 'I69264', 'I69265', 'I69269', 'I69290', 'I69291', 'I69292', 'I69293', 'I69298', 'P520', 'P521', 'P5221', 'P5222', 'P523', 'P524', 'P525', 'P526', 'P528', 'P529' |

|                              |                                                                                                                                                                                                                                                                                                                                                                                                                                                                                                                                                                                                                                                                                                                                                                                                                                                                                                                                                                                                                                                                                                                                                                                                                                                                                                                                                                                                                                                                                                                                                                                                                                                                                                                                                                                                                                                                                                                                                                                                                                                                                                                                                                                                                                                                                                                                                                                                                                                                                                                                                                                                                                                                                                                                                     |
|------------------------------|-----------------------------------------------------------------------------------------------------------------------------------------------------------------------------------------------------------------------------------------------------------------------------------------------------------------------------------------------------------------------------------------------------------------------------------------------------------------------------------------------------------------------------------------------------------------------------------------------------------------------------------------------------------------------------------------------------------------------------------------------------------------------------------------------------------------------------------------------------------------------------------------------------------------------------------------------------------------------------------------------------------------------------------------------------------------------------------------------------------------------------------------------------------------------------------------------------------------------------------------------------------------------------------------------------------------------------------------------------------------------------------------------------------------------------------------------------------------------------------------------------------------------------------------------------------------------------------------------------------------------------------------------------------------------------------------------------------------------------------------------------------------------------------------------------------------------------------------------------------------------------------------------------------------------------------------------------------------------------------------------------------------------------------------------------------------------------------------------------------------------------------------------------------------------------------------------------------------------------------------------------------------------------------------------------------------------------------------------------------------------------------------------------------------------------------------------------------------------------------------------------------------------------------------------------------------------------------------------------------------------------------------------------------------------------------------------------------------------------------------------------|
| Ischemic Stroke              | <p>G43601','G43609','G43611','G43619','G450','G451','G452','G453','G454','G458','G459','I6300','I63011','I63012','I63013','I63019','I6302','I63031','I63032','I63033','I63039','I6309','I6310','I63111','I63112','I63113','I63119','I6312','I63131','I63132','I63133','I63139','I6319','I6320','I63211','I63212','I63213','I63219','I6322','I63231','I63232','I63233','I63239','I6329','I6330','I63311','I63312','I63313','I63319','I63321','I63322','I63323','I63329','I63331','I63332','I63333','I63339','I63341','I63342','I63343','I63349','I6339','I6340','I63411','I63412','I63413','I63419','I63421','I63422','I63423','I63429','I63431','I63432','I63433','I63439','I63441','I63442','I63443','I63449','I6349','I6350','I63511','I63512','I63513','I63519','I63521','I63522','I63523','I63529','I63531','I63532','I63533','I63539','I63541','I63542','I63543','I63549','I6359','I636','I638','I6381','I6389','I639','I6501','I6502','I6503','I6509','I651','I6521','I6522','I6523','I6529','I658','I659','I6601','I6602','I6603','I6609','I6611','I6612','I6613','I6619','I6621','I6622','I6623','I6629','I663','I668','I669','I672','I6782','I6930','I6931','I69310','I69311','I69312','I69313','I69314','I69315','I69318','I69319','I69320','I69321','I69322','I69323','I69328','I69331','I69332','I69333','I69334','I69339','I69341','I69342','I69343','I69344','I69349','I69351','I69352','I69353','I69354','I69359','I69361','I69362','I69363','I69364','I69365','I69369','I69390','I69391','I69392','I69393','I69398','I6980','I6981','I69810','I69811','I69812','I69813','I69814','I69815','I69818','I69819','I69820','I69821','I69822','I69823','I69828','I69831','I69832','I69833','I69834','I69839','I69841','I69842','I69843','I69844','I69849','I69851','I69852','I69853','I69854','I69859','I69861','I69862','I69863','I69864','I69865','I69869','I69890','I69891','I69892','I69893','I69898','I6990','I6991','I69910','I69911','I69912','I69913','I69914','I69915','I69918','I69919','I69920','I69921','I69922','I69923','I69928','I69931','I69932','I69933','I69934','I69939','I69941','I69942','I69943','I69944','I69949','I69951','I69952','I69953','I69954','I69959','I69961','I69962','I69963','I69964','I69965','I69969','I69990','I69991','I69992','I69993','I69998','I97810','I97811','I97820','I97821','P910','R29700','R29701','R29702','R29703','R29704','R29705','R29706','R29707','R29708','R29709','R29710','R29711','R29712','R29713','R29714','R29715','R29716','R29717','R29718','R29719','R29720','R29721','R29722','R29723','R29724','R29725','R29726','R29727','R29728','R29729','R29730','R29731','R29732','R29733','R29734','R29735','R29736','R29737','R29738','R29739','R29740','R29741','R29742'</p> |
| Myocardial Infarction        | <p>I2101','I2102','I2109','I2111','I2119','I2121','I2129','I213','I214','I219','I21A1','I21A9','I220','I221','I222','I228','I229','I230','I231','I232','I233','I234','I235','I236','I237','I238','I241'</p>                                                                                                                                                                                                                                                                                                                                                                                                                                                                                                                                                                                                                                                                                                                                                                                                                                                                                                                                                                                                                                                                                                                                                                                                                                                                                                                                                                                                                                                                                                                                                                                                                                                                                                                                                                                                                                                                                                                                                                                                                                                                                                                                                                                                                                                                                                                                                                                                                                                                                                                                         |
| Other Arterial Thrombosis    | <p>D735','I7401','I7409','I7410','I7411','I7419','I742','I743','I744','I745','I748','I749','I75011','I75012','I75013','I75019','I75021','I75022','I75023','I75029','I7581','I7589','I240','I76','I76','K763'</p>                                                                                                                                                                                                                                                                                                                                                                                                                                                                                                                                                                                                                                                                                                                                                                                                                                                                                                                                                                                                                                                                                                                                                                                                                                                                                                                                                                                                                                                                                                                                                                                                                                                                                                                                                                                                                                                                                                                                                                                                                                                                                                                                                                                                                                                                                                                                                                                                                                                                                                                                    |
| Other Venous Thromboembolism | <p>I2602','I2609','I2692','I2699','I8010','I8011','I8012','I8013','I80201','I80202','I80203','I80209','I80211','I80212','I80213','I80219','I80221','I80222','I80223','I80229','I80231','I80232','I80233','I80239','I80291','I80292','I80293','I80299','I803','I808','I809','I82210','I82220','I82290','I823','I82401','I82402','I82403','I82409','I82411','I82412','I82413','I82419','I82421','I82422','I82423','I82429','I82431','I82432','I82433','I82439','I82441','I82442','I82443','I82449','I82491','I82492','I82493','I82499','I824Y1','I824Y2','I824Y3','I824Y9','I824Z1','I824Z2','I824Z3','I824Z9','I82601','I82602','I82603','I82609','I82621','I82622','I82623','I82629','I82890','I82A11','I82A12','I82A13','I82A19','I82B11','I82B12','I82B13','I82B19','I82C11','I82C12','I82C13','I82C19','O2230','O2231','O2232','O2233','O871','O88211','O88212','O88213','O88219','O8822','O8823','I81','I820','I8290','K550'</p>                                                                                                                                                                                                                                                                                                                                                                                                                                                                                                                                                                                                                                                                                                                                                                                                                                                                                                                                                                                                                                                                                                                                                                                                                                                                                                                                                                                                                                                                                                                                                                                                                                                                                                                                                                                                                |

Pregnancy

'0000','00000','00001','0001','00010','000101','000102','000109','00011','000111','000112',  
'000119','0002','00020','000201','000202','000209','00021','000211','000212','000219','00  
'08','00080','00081','0009','00090','00091','0010','0011','0019','0020','0021','00281','00289  
,','0029','0030','0031','0032','00330','00331','00332','00333','00334','00335','00336','00337  
,','00338','00339','0034','0035','0036','0037','00380','00381','00382','00383','00384','00385  
,','00386','00387','00388','00389','0039','0045','0046','0047','00480','00481','00482','00483  
,','00484','00485','00486','00487','00488','00489','0070','0071','0072','00730','00731','0073  
2','00733','00734','00735','00736','00737','00738','00739','0074','0080','0081','0082','0083  
,','0084','0085','0086','0087','00881','00882','00883','00889','0089','00900','00901','00902',  
'00903','00910','00911','00912','00913','009211','009212','009213','009219','009291','009  
292','009293','009299','00930','00931','00932','00933','00940','00941','00942','00943','00  
9511','009512','009513','009519','009521','009522','009523','009529','009611','009612','0  
09613','009619','009621','009622','009623','009629','00970','00971','00972','00973','0098  
11','009812','009813','009819','009821','009822','009823','009829','009891','009892','009  
893','009899','00990','00991','00992','00993','009A0','009A1','009A2','009A3','01200','012  
01','01202','01203','01204','01205','01210','01211','01212','01213','01214','01215','01220',  
'01221','01222','01223','01224','01225','01404','01405','01414','01415','01424','01425','01  
494','01495','0151','0152','0200','0208','0209','0210','0211','0212','0218','0219','02200','0  
2201','02202','02203','02210','02211','02212','02213','02220','02221','02222','02223','022  
30','02231','02232','02233','02240','02241','02242','02243','02250','02251','02252','02253',  
'0228X1','0228X2','0228X3','0228X9','02290','02291','02292','02293','02300','02301','0230  
2','02303','02310','02311','02312','02313','02320','02321','02322','02323','02330','02331',  
02332','02333','02340','02341','02342','02343','023511','023512','023513','023519','02352  
1','023522','023523','023529','023591','023592','023593','023599','02390','02391','02392',  
02393','024011','024012','024013','024019','02402','02403','024111','024112','024113','02  
4119','02412','02413','02510','02511','02512','02513','0252','0253','02600','02601','02602',  
'02603','02610','02611','02612','02613','02620','02621','02622','02623','02630','02631','02  
632','02633','02640','02641','02642','02643','02650','02651','02652','02653','026611','026  
612','026613','026619','02662','02663','026711','026712','026713','026719','02672','02673'  
,','026811','026812','026813','026819','026821','026822','026823','026829','026831','026832  
,','026833','026839','026841','026842','026843','026849','026851','026852','026853','02685  
9','02686','026872','026873','026879','026891','026892','026893','026899','02690','02691',  
02692','02693','0280','0281','0282','0283','0284','0285','0288','0289','029011','029012','0  
29013','029019','029021','029022','029023','029029','029091','029092','029093','029099',  
029111','029112','029113','029119','029121','029122','029123','029129','029191','029192',  
'029193','029199','029211','029212','029213','029219','029291','029292','029293','029299'  
,','0293X1','0293X2','0293X3','0293X9','02940','02941','02942','02943','0295X1','0295X2','02  
95X3','0295X9','02960','02961','02962','02963','0298X1','0298X2','0298X3','0298X9','02990'  
,','02991','02992','02993','030001','030002','030003','030009','030011','030012','030013','0  
30019','030021','030022','030023','030029','030031','030032','030033','030039','030041',  
030042','030043','030049','030091','030092','030093','030099','030101','030102','030103',  
'030109','030111','030112','030113','030119','030121','030122','030123','030129','030131'  
,','030132','030133','030139','030191','030192','030193','030199','030201','030202','030203  
,','030209','030211','030212','030213','030219','030221','030222','030223','030229','03023  
1','030232','030233','030239','030291','030292','030293','030299','030801','030802','0308  
03','030809','030811','030812','030813','030819','030821','030822','030823','030829','030  
831','030832','030833','030839','030891','030892','030893','030899','03090','03091','0309  
2','03093','03100X0','03100X1','03100X2','03100X3','03100X4','03100X5','03100X9','03101X  
0','03101X1','03101X2','03101X3','03101X4','03101X5','03101X9','03102X0','03102X1','0310  
2X2','03102X3','03102X4','03102X5','03102X9','03103X0','03103X1','03103X2','03103X3','03  
103X4','03103X5','03103X9','03110X0','03110X1','03110X2','03110X3','03110X4','03110X5',  
03110X9','03111X0','03111X1','03111X2','03111X3','03111X4','03111X5','03111X9','03112X  
0','03112X1','03112X2','03112X3','03112X4','03112X5','03112X9','03113X0','03113X1','0311

3X2','O3113X3','O3113X4','O3113X5','O3113X9','O3120X0','O3120X1','O3120X2','O3120X3','O3120X4','O3120X5','O3120X9','O3121X0','O3121X1','O3121X2','O3121X3','O3121X4','O3121X5','O3121X9','O3122X0','O3122X1','O3122X2','O3122X3','O3122X4','O3122X5','O3122X9','O3123X0','O3123X1','O3123X2','O3123X3','O3123X4','O3123X5','O3123X9','O3130X0','O3130X1','O3130X2','O3130X3','O3130X4','O3130X5','O3130X9','O3131X0','O3131X1','O3131X2','O3131X3','O3131X4','O3131X5','O3131X9','O3132X0','O3132X1','O3132X2','O3132X3','O3132X4','O3132X5','O3132X9','O3133X0','O3133X1','O3133X2','O3133X3','O3133X4','O3133X5','O3133X9','O318X10','O318X11','O318X12','O318X13','O318X14','O318X15','O318X19','O318X20','O318X21','O318X22','O318X23','O318X24','O318X25','O318X29','O318X30','O318X31','O318X32','O318X33','O318X34','O318X35','O318X39','O318X90','O318X91','O318X92','O318X93','O318X94','O318X95','O318X99','O320XX0','O320XX1','O320XX2','O320XX3','O320XX4','O320XX5','O320XX9','O321XX0','O321XX1','O321XX2','O321XX3','O321XX4','O321XX5','O321XX9','O322XX0','O322XX1','O322XX2','O322XX3','O322XX4','O322XX5','O322XX9','O323XX0','O323XX1','O323XX2','O323XX3','O323XX4','O323XX5','O323XX9','O324XX0','O324XX1','O324XX2','O324XX3','O324XX4','O324XX5','O324XX9','O326XX0','O326XX1','O326XX2','O326XX3','O326XX4','O326XX5','O326XX9','O328XX0','O328XX1','O328XX2','O328XX3','O328XX4','O328XX5','O328XX9','O329XX0','O329XX1','O329XX2','O329XX3','O329XX4','O329XX5','O329XX9','O330','O331','O332','O333XX0','O333XX1','O333XX2','O333XX3','O333XX4','O333XX5','O333XX9','O334XX0','O334XX1','O334XX2','O334XX3','O334XX4','O334XX5','O334XX9','O335XX0','O335XX1','O335XX2','O335XX3','O335XX4','O335XX5','O335XX9','O336XX0','O336XX1','O336XX2','O336XX3','O336XX4','O336XX5','O336XX9','O337','O337XX0','O337XX1','O337XX2','O337XX3','O337XX4','O337XX5','O337XX9','O338','O339','O3400','O3401','O3402','O3403','O3410','O3411','O3412','O3413','O3421','O34211','O34212','O34219','O3429','O3430','O3431','O3432','O3433','O3440','O3441','O3442','O3443','O34511','O34512','O34513','O34519','O34521','O34522','O34523','O34529','O34531','O34532','O34533','O34539','O34591','O34592','O34593','O34599','O3460','O3461','O3462','O3463','O3470','O3471','O3472','O3473','O3480','O3481','O3482','O3483','O3490','O3491','O3492','O3493','O350XX0','O350XX1','O350XX2','O350XX3','O350XX4','O350XX5','O350XX9','O351XX0','O351XX1','O351XX2','O351XX3','O351XX4','O351XX5','O351XX9','O352XX0','O352XX1','O352XX2','O352XX3','O352XX4','O352XX5','O352XX9','O353XX0','O353XX1','O353XX2','O353XX3','O353XX4','O353XX5','O353XX9','O354XX0','O354XX1','O354XX2','O354XX3','O354XX4','O354XX5','O354XX9','O355XX0','O355XX1','O355XX2','O355XX3','O355XX4','O355XX5','O355XX9','O356XX0','O356XX1','O356XX2','O356XX3','O356XX4','O356XX5','O356XX9','O357XX0','O357XX1','O357XX2','O357XX3','O357XX4','O357XX5','O357XX9','O358XX0','O358XX1','O358XX2','O358XX3','O358XX4','O358XX5','O358XX9','O359XX0','O359XX1','O359XX2','O359XX3','O359XX4','O359XX5','O359XX9','O360110','O360111','O360112','O360113','O360114','O360115','O360119','O360120','O360121','O360122','O360123','O360124','O360125','O360129','O360130','O360131','O360132','O360133','O360134','O360135','O360139','O360190','O360191','O360192','O360193','O360194','O360195','O360199','O360910','O360911','O360912','O360913','O360914','O360915','O360919','O360920','O360921','O360922','O360923','O360924','O360925','O360929','O360930','O360931','O360932','O360933','O360934','O360935','O360939','O360990','O360991','O360992','O360993','O360994','O360995','O360999','O361110','O361111','O361112','O361113','O361114','O361115','O361119','O361120','O361121','O361122','O361123','O361124','O361125','O361129','O361130','O361131','O361132','O361133','O361134','O361135','O361139','O361190','O361191','O361192','O361193','O361194','O361195','O361199','O361910','O361911','O361912','O361913','O361914','O361915','O361919','O361920','O361921','O361922','O361923','O361924','O361925','O361929','O361930','O361931','O361932','O361933','O361934','O361935','O361939','O361990','O361991','O361992','O361993','O361994','O361995','O361999','O3620X0','O3620X1','O3620X2','O3620X3','O3620X4','O3620X5','O3620X9','O3621X0','O3621X1','O3621X2','O3621X3','O3621X4','O3621X5','O3621X9','O3622X0','O3622X1','O3622X2','O3622X3','O3622X4','O3622X5','O3622X9','O3623X0','O3623X1','O3623X2','O3623X3','O3623X4','O3623X5','O3623X9','O364XX0','O364XX1','O364XX2','O364XX3','O364XX4','O364XX5','O364XX9','O365110','O365111','O365112','O365113','O365114','O365115','O365119','O365120','O365121','O365122','O365123','O365124','O365125','O365129','O365130','O365131','O365132','O365133','O365134',

'0365135','0365139','0365190','0365191','0365192','0365193','0365194','0365195','0365199','0365910','0365911','0365912','0365913','0365914','0365915','0365919','0365920','0365921','0365922','0365923','0365924','0365925','0365929','0365930','0365931','0365932','0365933','0365934','0365935','0365939','0365990','0365991','0365992','0365993','0365994','0365995','0365999','03660X0','03660X1','03660X2','03660X3','03660X4','03660X5','03660X9','03661X0','03661X1','03661X2','03661X3','03661X4','03661X5','03661X9','03662X0','03662X1','03662X2','03662X3','03662X4','03662X5','03662X9','03663X0','03663X1','03663X2','03663X3','03663X4','03663X5','03663X9','03670X0','03670X1','03670X2','03670X3','03670X4','03670X5','03670X9','03671X0','03671X1','03671X2','03671X3','03671X4','03671X5','03671X9','03672X0','03672X1','03672X2','03672X3','03672X4','03672X5','03672X9','03673X0','03673X1','03673X2','03673X3','03673X4','03673X5','03673X9','03680X0','03680X1','03680X2','03680X3','03680X4','03680X5','03680X9','0368120','0368121','0368122','0368123','0368124','0368125','0368129','0368130','0368131','0368132','0368133','0368134','0368135','0368139','0368190','0368191','0368192','0368193','0368194','0368195','0368199','0368210','0368211','0368212','0368213','0368214','0368215','0368219','0368220','0368221','0368222','0368223','0368224','0368225','0368229','0368230','0368231','0368232','0368233','0368234','0368235','0368239','0368290','0368291','0368292','0368293','0368294','0368295','0368299','0368310','0368311','0368312','0368313','0368314','0368315','0368319','0368320','0368321','0368322','0368323','0368324','0368325','0368329','0368330','0368331','0368332','0368333','0368334','0368335','0368339','0368390','0368391','0368392','0368393','0368394','0368395','0368399','0368910','0368911','0368912','0368913','0368914','0368915','0368919','0368920','0368921','0368922','0368923','0368924','0368925','0368929','0368930','0368931','0368932','0368933','0368934','0368935','0368939','0368990','0368991','0368992','0368993','0368994','0368995','0368999','03690X0','03690X1','03690X2','03690X3','03690X4','03690X5','03690X9','03691X0','03691X1','03691X2','03691X3','03691X4','03691X5','03691X9','03692X0','03692X1','03692X2','03692X3','03692X4','03692X5','03692X9','03693X0','03693X1','03693X2','03693X3','03693X4','03693X5','03693X9','0401XX0','0401XX1','0401XX2','0401XX3','0401XX4','0401XX5','0401XX9','0402XX0','0402XX1','0402XX2','0402XX3','0402XX4','0402XX5','0402XX9','0403XX0','0403XX1','0403XX2','0403XX3','0403XX4','0403XX5','0403XX9','0409XX0','0409XX1','0409XX2','0409XX3','0409XX4','0409XX5','0409XX9','04100X0','04100X1','04100X2','04100X3','04100X4','04100X5','04100X9','04101X0','04101X1','04101X2','04101X3','04101X4','04101X5','04101X9','04102X0','04102X1','04102X2','04102X3','04102X4','04102X5','04102X9','04103X0','04103X1','04103X2','04103X3','04103X4','04103X5','04103X9','0418X10','0418X11','0418X12','0418X13','0418X14','0418X15','0418X19','0418X20','0418X21','0418X22','0418X23','0418X24','0418X25','0418X29','0418X30','0418X31','0418X32','0418X33','0418X34','0418X35','0418X39','0418X90','0418X91','0418X92','0418X93','0418X94','0418X95','0418X99','04190X0','04190X1','04190X2','04190X3','04190X4','04190X5','04190X9','04191X0','04191X1','04191X2','04191X3','04191X4','04191X5','04191X9','04192X0','04192X1','04192X2','04192X3','04192X4','04192X5','04192X9','04193X0','04193X1','04193X2','04193X3','04193X4','04193X5','04193X9','04200','042011','042012','042013','042019','04202','04210','042111','042112','042113','042119','04212','04290','042911','042912','042913','042919','04292','043011','043012','043013','043019','043021','043022','043023','043029','043101','043102','043103','043109','043111','043112','043113','043119','043121','043122','043123','043129','043191','043192','043193','043199','043211','043212','043213','043219','043221','043222','043223','043229','043231','043232','043233','043239','043811','043812','043813','043819','043891','043892','043893','043899','04390','04391','04392','04393','04400','04401','04402','04403','04410','04411','04412','04413','04420','04421','04422','04423','04430','04431','04432','04433','04440','04441','04442','04443','04450','04451','04452','04453','045001','045002','045003','045009','045011','045012','045013','045019','045021','045022','045023','045029','045091','045092','045093','045099','0458X1','0458X2','0458X3','0458X9','04590','04591','04592','04593','046001','046002','046003','046009','046011','046012','046013','046019','046021','046022','046023','046029','046091','046092','046093','046099','0468X1','0468X2','0468X3','0468X9','04690','04691','04692','04693','04700','047

'02','04703','0471','0479','0480','0481','06000','06002','06003','06010X0','06010X1','06010X2','06010X3','06010X4','06010X5','06010X9','06012X0','06012X1','06012X2','06012X3','06012X4','06012X5','06012X9','06013X0','06013X1','06013X2','06013X3','06013X4','06013X5','06013X9','06014X0','06014X1','06014X2','06014X3','06014X4','06014X5','06014X9','06020X0','06020X1','06020X2','06020X3','06020X4','06020X5','06020X9','06022X0','06022X1','06022X2','06022X3','06022X4','06022X5','06022X9','06023X0','06023X1','06023X2','06023X3','06023X4','06023X5','06023X9','0610','0611','0618','0619','0620','0621','0622','0623','0624','0628','0629','0630','0631','0632','0639','0640XX0','0640XX1','0640XX2','0640XX3','0640XX4','0640XX5','0640XX9','0641XX0','0641XX1','0641XX2','0641XX3','0641XX4','0641XX5','0641XX9','0642XX0','0642XX1','0642XX2','0642XX3','0642XX4','0642XX5','0642XX9','0643XX0','0643XX1','0643XX2','0643XX3','0643XX4','0643XX5','0643XX9','0644XX0','0644XX1','0644XX2','0644XX3','0644XX4','0644XX5','0644XX9','0645XX0','0645XX1','0645XX2','0645XX3','0645XX4','0645XX5','0645XX9','0648XX0','0648XX1','0648XX2','0648XX3','0648XX4','0648XX5','0648XX9','0649XX0','0649XX1','0649XX2','0649XX3','0649XX4','0649XX5','0649XX9','0650','0651','0652','0653','0654','0655','0658','0659','0660','0661','0662','0663','06640','06641','0665','0666','0668','0669','0670','0678','0679','068','0690XX0','0690XX1','0690XX2','0690XX3','0690XX4','0690XX5','0690XX9','0691XX0','0691XX1','0691XX2','0691XX3','0691XX4','0691XX5','0691XX9','0692XX0','0692XX1','0692XX2','0692XX3','0692XX4','0692XX5','0692XX9','0693XX0','0693XX1','0693XX2','0693XX3','0693XX4','0693XX5','0693XX9','0694XX0','0694XX1','0694XX2','0694XX3','0694XX4','0694XX5','0694XX9','0695XX0','0695XX1','0695XX2','0695XX3','0695XX4','0695XX5','0695XX9','06981X0','06981X1','06981X2','06981X3','06981X4','06981X5','06981X9','06982X0','06982X1','06982X2','06982X3','06982X4','06982X5','06982X9','06989X0','06989X1','06989X2','06989X3','06989X4','06989X5','06989X9','0699XX0','0699XX1','0699XX2','0699XX3','0699XX4','0699XX5','0699XX9','0700','0701','0702','07020','07021','07022','07023','0703','0704','0709','07100','07102','07103','0711','0712','0713','0714','0715','0716','0717','07181','07182','07189','0719','0720','0721','0722','0723','0730','0731','0740','0741','0742','0743','0744','0745','0746','0747','0748','0749','0750','0751','0752','0753','0754','0755','07581','07582','07589','0759','076','0770','0771','0778','0779','080','082','085','0860','08600','08601','08602','08603','08604','08609','08611','08612','08613','08619','08620','08621','08622','08629','0864','08681','08689','0870','0871','0872','0873','0874','0878','0879','088011','088012','088013','088019','08802','08803','088111','088112','088113','088119','08812','08813','088211','088212','088213','088219','08822','08823','088311','088312','088313','088319','08832','08833','088811','088812','088813','088819','08882','08883','08901','08909','0891','0892','0893','0894','0895','0896','0898','0899','0900','0901','0902','0903','0904','0905','0906','09081','09089','0909','091011','091012','091013','091019','09102','09103','091111','091112','091113','091119','09112','09113','091211','091212','091213','091219','09122','09123','092011','092012','092013','092019','09202','09203','092111','092112','092113','092119','09212','09213','09220','09229','0923','0924','0925','0926','09270','09279','094','098011','098012','098013','098019','09802','09803','098111','098112','098113','098119','09812','09813','098211','098212','098213','098219','09822','09823','098311','098312','098313','098319','09832','09833','098411','098412','098413','098419','09842','09843','098511','098512','098513','098519','09852','09853','098611','098612','098613','098619','09862','09863','098711','098712','098713','098719','09872','09873','098811','098812','098813','098819','09882','09883','098911','098912','098913','098919','09892','09893','099011','099012','099013','099019','09902','09903','099111','099112','099113','099119','09912','09913','099210','099211','099212','099213','099214','099215','099280','099281','099282','099283','099284','099285','099310','099311','099312','099313','099314','099315','099320','099321','099322','099323','099324','099325','099330','099331','099332','099333','099334','099335','099340','099341','099342','099343','099344','099345','099350','099351','099352','099353','099354','099355','099411','099412','099413','099419','09942','09943','099511','099512','099513','099519','09952','09953','099611','099612','099613','099619','09962','09963','099711','099712','099713','099719','09972','09973','099820','099824','099825','099830','099834','099835','099840','099841','099842','099843','099844','099845','09989','

'09A111','09A112','09A113','09A119','09A12','09A13','09A211','09A212','09A213','09A219','09A22','09A23','09A311','09A312','09A313','09A319','09A32','09A33','09A411','09A412','09A413','09A419','09A42','09A43','09A511','09A512','09A513','09A519','09A52','09A53','Z3201','Z331','Z332','Z333','Z3400','Z3401','Z3402','Z3403','Z3480','Z3481','Z3482','Z3483','Z3490','Z3491','Z3492','Z3493','Z370','Z371','Z372','Z373','Z374','Z3750','Z3751','Z3752','Z3753','Z3754','Z3759','Z3760','Z3761','Z3762','Z3763','Z3764','Z3769','Z377','Z379','Z390','Z391','Z392','Z3A00','Z3A01','Z3A08','Z3A09','Z3A10','Z3A11','Z3A12','Z3A13','Z3A14','Z3A15','Z3A16','Z3A17','Z3A18','Z3A19','Z3A20','Z3A21','Z3A22','Z3A23','Z3A24','Z3A25','Z3A26','Z3A27','Z3A28','Z3A29','Z3A30','Z3A31','Z3A32','Z3A33','Z3A34','Z3A35','Z3A36','Z3A37','Z3A38','Z3A39','Z3A40','Z3A41','Z3A42','Z3A49','O10011','O10012','O10013','O10019','O1002','O1003','O10111','O10112','O10113','O10119','O1012','O1013','O10211','O10212','O10213','O10219','O1022','O1023','O10311','O10312','O10313','O10319','O1032','O1033','O10411','O10412','O10413','O10419','O1042','O1043','O10911','O10912','O10913','O10919','O1092','O1093','O111','O112','O113','O114','O115','O119','O131','O132','O133','O134','O135','O139','O1400','O1402','O1403','O1410','O1412','O1413','O1420','O1422','O1423','O1490','O1492','O1493','O1500','O1502','O1503','O159','O161','O162','O163','O164','O165','O169','O24311','O24312','O24313','O24319','O2432','O2433','O24410','O24414','O24415','O24419','O24420','O24424','O24425','O24429','O24430','O24434','O24435','O24439','O24811','O24812','O24813','O24819','O2482','O2483','O24911','O24912','O24913','O24919','O2492','O2493','O411010','O411011','O411012','O411013','O411014','O411015','O411019','O411020','O411021','O411022','O411023','O411024','O411025','O411029','O411030','O411031','O411032','O411033','O411034','O411035','O411039','O411090','O411091','O411092','O411093','O411094','O411095','O411099','O411210','O411211','O411212','O411213','O411214','O411215','O411219','O411220','O411221','O411222','O411223','O411224','O411225','O411229','O411230','O411231','O411232','O411233','O411234','O411235','O411239','O411290','O411291','O411292','O411293','O411294','O411295','O411299','O411410','O411411','O411412','O411413','O411414','O411415','O411419','O411420','O411421','O411422','O411423','O411424','O411425','O411429','O411430','O411431','O411432','O411433','O411434','O411435','O411439','O411490','O411491','O411492','O411493','O411494','O411495','O411499','O99810','O99814','O99815'

Meningitis,  
Encephalitis, or  
Other CNS Infection

'A0101','A0221','A066','A170','A171','A1781','A1782','A1783','A1789','A179','A203','A2781','A3211','A3212','A390','A3981','A4281','A4282','A5041','A5042','A5141','A5210','A5211','A5212','A5213','A5214','A5217','A5219','A522','A523','A5481','A5482','A6921','A800','A801','A802','A8030','A8039','A804','A809','A8100','A8101','A8109','A811','A812','A8181','A8182','A8183','A8189','A819','A820','A821','A829','A830','A831','A832','A833','A834','A835','A836','A838','A839','A840','A841','A848','A849','A850','A851','A852','A858','A86','A870','A871','A872','A878','A879','A880','A881','A888','A89','A922','A9231','B003','B004','B010','B0111','B020','B021','B050','B051','B0601','B0602','B1001','B1009','B261','B262','B2702','B2712','B2782','B2792','B375','B384','B4081','B4281','B431','B451','B5741','B5742','B582','B6011','B900','D8681','G000','G001','G002','G003','G008','G009','G01','G02','G030','G031','G032','G038','G039','G0400','G0401','G0402','G042','G0430','G0431','G0432','G0439','G0481','G0489','G0490','G0491','G053','G054','G060','G061','G062','G07','G14','J1081','J1181'

|                              |                                                                                                                                                                                                                                                                                                                                                                                                                                                                                                                                                                                                                                                                                                                                                                                                                                                                                                                                                                                                                                                                                                                                                                                                                                                                                                                                                                                                                                                                                                                                                                                                                                                                                                                        |
|------------------------------|------------------------------------------------------------------------------------------------------------------------------------------------------------------------------------------------------------------------------------------------------------------------------------------------------------------------------------------------------------------------------------------------------------------------------------------------------------------------------------------------------------------------------------------------------------------------------------------------------------------------------------------------------------------------------------------------------------------------------------------------------------------------------------------------------------------------------------------------------------------------------------------------------------------------------------------------------------------------------------------------------------------------------------------------------------------------------------------------------------------------------------------------------------------------------------------------------------------------------------------------------------------------------------------------------------------------------------------------------------------------------------------------------------------------------------------------------------------------------------------------------------------------------------------------------------------------------------------------------------------------------------------------------------------------------------------------------------------------|
| Head or Neck Infection       | A186,'A211','A3281','A360','A361','A362','A3686','A380','A422','A5003','A5005','A5431','A545',<br>'A690','A740','B002','B0050','B0053','B0059','B0231','B0239','B053','B0581','B084','B085','B086<br>1','B300','B301','B302','B303','B308','B309','B370','B3781','B3783','B3784','B442','B461','B6012'<br>,'B6013','B873','H00031','H00032','H00033','H00034','H00035','H00036','H00039','H05011','H0<br>5012','H05013','H05019','H05021','H05022','H05023','H05029','H20031','H20032','H20033','H2<br>0039','H44021','H44022','H44023','H44029','H5940','H5941','H5942','H5943','H6000','H6001','<br>H6002','H6003','H60391','H60392','H60393','H60399','H61321','H61322','H61323','H61329','H6<br>500','H6501','H6502','H6503','H6504','H6505','H6506','H6507','H65111','H65112','H65113','H6<br>5114','H65115','H65116','H65117','H65119','H65191','H65192','H65193','H65194','H65195','H6<br>5196','H65197','H65199','H6520','H6521','H6522','H6523','H6530','H6531','H6532','H6533','H6<br>5411','H65412','H65413','H65419','H65491','H65492','H65493','H65499','H6590','H6591','H659<br>2','H6593','H66001','H66002','H66003','H66004','H66005','H66006','H66007','H66009','H66011<br>','H66012','H66013','H66014','H66015','H66016','H66017','H66019','H6610','H6611','H6612','H<br>6613','H6620','H6621','H6622','H6623','H663X1','H663X2','H663X3','H663X9','H6640','H6641','<br>H6642','H6643','H6690','H6691','H6692','H6693','H671','H672','H673','H679','H70011','H70012'<br>,'H70013','H70019','H7500','H7501','H7502','H7503','H9400','H9401','H9402','H9403','J00','J02<br>0','J028','J029','J0300','J0301','J0380','J0381','J060','J340','J36','J390','K046','K047','K113','K122'<br>,'J1083','J1183' |
| Prior Venous Thromboembolism | I82211','I82221','I82291','I82501','I82502','I82503','I82509','I82511','I82512','I82513','I82519','I<br>82521','I82522','I82523','I82529','I82531','I82532','I82533','I82539','I82541','I82542','I82543','I<br>82549','I82591','I82592','I82593','I82599','I825Y1','I825Y2','I825Y3','I825Y9','I825Z1','I825Z2','I8<br>25Z3','I825Z9','I82701','I82702','I82703','I82709','I82711','I82712','I82713','I82719','I82721','I82<br>722','I82723','I82729','I82891','I8291','I82A21','I82A22','I82A23','I82A29','I82B21','I82B22','I82B<br>23','I82B29','I82C21','I82C22','I82C23','I82C29','I87001','I87002','I87003','I87009','I87011','I870<br>12','I87013','I87019','I87021','I87022','I87023','I87029','I87031','I87032','I87033','I87039','I870<br>91','I87092','I87093','I87099','I871','I872','I87301','I87302','I87303','I87309','I87311','I87312','I<br>87313','I87319','I87321','I87322','I87323','I87329','I87331','I87332','I87333','I87339','I87391','I<br>87392','I87393','I87399','Z86711','Z86718','I2724','I2782'                                                                                                                                                                                                                                                                                                                                                                                                                                                                                                                                                                                                                                                                                         |
| Thrombophilia                | D6851','D6852','D6859','D6861','D6862','D6869'                                                                                                                                                                                                                                                                                                                                                                                                                                                                                                                                                                                                                                                                                                                                                                                                                                                                                                                                                                                                                                                                                                                                                                                                                                                                                                                                                                                                                                                                                                                                                                                                                                                                         |



Malignancy

C000,'C001','C002','C003','C004','C005','C006','C008','C009','C01','C020','C021','C022','C023','C024','C028','C029','C030','C031','C039','C040','C041','C048','C049','C050','C051','C052','C058','C059','C060','C061','C062','C0680','C0689','C069','C07','C080','C081','C089','C090','C091','C098','C099','C100','C101','C102','C103','C104','C108','C109','C110','C111','C112','C113','C118','C119','C12','C130','C131','C132','C138','C139','C140','C142','C148','C153','C154','C155','C158','C159','C160','C161','C162','C163','C164','C165','C166','C168','C169','C170','C171','C172','C173','C178','C179','C180','C181','C182','C183','C184','C185','C186','C187','C188','C189','C19','C20','C210','C211','C212','C218','C220','C221','C222','C223','C224','C227','C228','C229','C23','C240','C241','C248','C249','C250','C251','C252','C253','C254','C257','C258','C259','C260','C261','C269','C300','C301','C310','C311','C312','C313','C318','C319','C320','C321','C322','C323','C328','C329','C33','C3400','C3401','C3402','C3410','C3411','C3412','C342','C3430','C3431','C3432','C3480','C3481','C3482','C3490','C3491','C3492','C37','C380','C381','C382','C383','C384','C388','C390','C399','C4000','C4001','C4002','C4010','C4011','C4012','C4020','C4021','C4022','C4030','C4031','C4032','C4080','C4081','C4082','C4090','C4091','C4092','C410','C411','C412','C413','C414','C419','C430','C4310','C4311','C43111','C43112','C4312','C43121','C43122','C4320','C4321','C4322','C4330','C4331','C4339','C434','C4351','C4352','C4359','C4360','C4361','C4362','C4370','C4371','C4372','C438','C439','C4400','C4401','C4402','C4409','C44101','C44102','C441021','C441022','C44109','C441091','C441092','C44111','C44112','C441121','C441122','C44119','C441191','C441192','C44121','C44122','C441221','C441222','C44129','C441291','C441292','C44131','C441321','C441322','C441391','C441392','C44191','C44192','C441921','C441922','C44199','C441991','C441992','C44201','C44202','C44209','C44211','C44212','C44219','C44221','C44222','C44229','C44291','C44292','C44299','C44300','C44301','C44309','C44310','C44311','C44319','C44320','C44321','C44329','C44390','C44391','C44399','C4440','C4441','C4442','C4449','C44500','C44501','C44509','C44510','C44511','C44519','C44520','C44521','C44529','C44590','C44591','C44599','C44601','C44602','C44609','C44611','C44612','C44619','C44621','C44622','C44629','C44691','C44692','C44699','C44701','C44702','C44709','C44711','C44712','C44719','C44721','C44722','C44729','C44791','C44792','C44799','C4480','C4481','C4482','C4489','C4490','C4491','C4492','C4499','C450','C451','C452','C457','C459','C460','C461','C462','C463','C464','C4650','C4651','C4652','C467','C469','C470','C4710','C4711','C4712','C4720','C4721','C4722','C473','C474','C475','C476','C478','C479','C480','C481','C482','C488','C488','C490','C4910','C4911','C4912','C4920','C4921','C4922','C493','C494','C495','C496','C498','C499','C49A0','C49A1','C49A2','C49A3','C49A4','C49A5','C49A9','C4A0','C4A10','C4A11','C4A111','C4A112','C4A12','C4A121','C4A122','C4A20','C4A21','C4A22','C4A30','C4A31','C4A39','C4A4','C4A51','C4A52','C4A59','C4A60','C4A61','C4A62','C4A70','C4A71','C4A72','C4A8','C4A9','C50011','C50012','C50019','C50021','C50022','C50029','C50111','C50112','C50119','C50121','C50122','C50129','C50211','C50212','C50219','C50221','C50222','C50229','C50311','C50312','C50319','C50321','C50322','C50329','C50411','C50412','C50419','C50421','C50422','C50429','C50511','C50512','C50519','C50521','C50522','C50529','C50611','C50612','C50619','C50621','C50622','C50629','C50811','C50812','C50819','C50821','C50822','C50829','C50911','C50912','C50919','C50921','C50922','C50929','C510','C511','C512','C518','C519','C52','C530','C531','C538','C539','C540','C541','C542','C543','C548','C549','C55','C561','C562','C569','C5700','C5701','C5702','C5710','C5711','C5712','C5720','C5721','C5722','C573','C574','C577','C578','C579','C58','C600','C601','C602','C608','C609','C61','C6200','C6201','C6202','C6210','C6211','C6212','C6290','C6291','C6292','C6300','C6301','C6302','C6310','C6311','C6312','C632','C637','C638','C639','C641','C642','C649','C651','C652','C659','C661','C662','C669','C670','C671','C672','C673','C674','C675','C676','C677','C678','C679','C680','C681','C688','C689','C6900','C6901','C6902','C6910','C6911','C6912','C6920','C6921','C6922','C6930','C6931','C6932','C6940','C6941','C6942','C6950','C6951','C6952','C6960','C6961','C6962','C6980','C6981','C6982','C6990','C6991','C6992','C700','C701','C709','C710','C711','C712','C713','C714','C715','C716','C717','C718','C719','C720','C721','C7220','C7221','C7222','C7230','C7231','C7232','C7240','C7241','C7242','C7250','C7259','C729','C73','C7400','C7401','C7402','C7410','C7411','C7412','C7490','C7491','C7492','C750','C751','C752','C753','C754','C755','C758','C759','C760','C761','C762','C763','C7640','C7641','C7642','C7650','C7651','C7652','C768','C770','C771','C772','C773','C774','C775','C778','C779','C7800','C7801','C7802','C781','C782','C7830','C7

839','C784','C785','C786','C787','C7880','C7889','C7900','C7901','C7902','C7910','C7911','C7919',  
, 'C792','C7931','C7932','C7940','C7949','C7951','C7952','C7960','C7961','C7962','C7970','C7971',  
, 'C7972','C7981','C7982','C7989','C799','C7A00','C7A010','C7A011','C7A012','C7A019','C7A020',  
, 'C7A021','C7A022','C7A023','C7A024','C7A025','C7A026','C7A029','C7A090','C7A091','C7A092',  
, 'C7A093','C7A094','C7A095','C7A096','C7A098','C7A1','C7A8','C7B00','C7B01','C7B02','C7B03',  
, 'C7B04','C7B09','C7B1','C7B8','C800','C801','C802','C8100','C8101','C8102','C8103','C8104','C81',  
, '05','C8106','C8107','C8108','C8109','C8110','C8111','C8112','C8113','C8114','C8115','C8116','C8',  
, '117','C8118','C8119','C8120','C8121','C8122','C8123','C8124','C8125','C8126','C8127','C8128','C',  
, '8129','C8130','C8131','C8132','C8133','C8134','C8135','C8136','C8137','C8138','C8139','C8140',  
, 'C8141','C8142','C8143','C8144','C8145','C8146','C8147','C8148','C8149','C8170','C8171','C8172',  
, 'C8173','C8174','C8175','C8176','C8177','C8178','C8179','C8190','C8191','C8192','C8193','C819',  
, '4','C8195','C8196','C8197','C8198','C8199','C8200','C8201','C8202','C8203','C8204','C8205','C82',  
, '06','C8207','C8208','C8209','C8210','C8211','C8212','C8213','C8214','C8215','C8216','C8217','C8',  
, '218','C8219','C8220','C8221','C8222','C8223','C8224','C8225','C8226','C8227','C8228','C8229','C',  
, '8230','C8231','C8232','C8233','C8234','C8235','C8236','C8237','C8238','C8239','C8240','C8241',  
, 'C8242','C8243','C8244','C8245','C8246','C8247','C8248','C8249','C8250','C8251','C8252','C8253',  
, 'C8254','C8255','C8256','C8257','C8258','C8259',  
, 'C8260','C8261','C8262','C8263','C8264','C8265','C8266','C8267','C8268','C8269','C8280','C8281',  
, 'C8282','C8283','C8284','C8285','C8286','C8287','C8288','C8289','C8290','C8291','C8292','C829',  
, '3','C8294','C8295','C8296','C8297','C8298','C8299','C8300','C8301','C8302','C8303','C8304','C83',  
, '05','C8306','C8307','C8308','C8309','C8310','C8311','C8312','C8313','C8314','C8315','C8316','C8',  
, '317','C8318','C8319','C8330','C8331','C8332','C8333','C8334','C8335','C8336','C8337','C8338','C',  
, '8339','C8350','C8351','C8352','C8353','C8354','C8355','C8356','C8357','C8358','C8359','C8370',  
, 'C8371','C8372','C8373','C8374','C8375','C8376','C8377','C8378','C8379','C8380','C8381','C8382',  
, 'C8383','C8384','C8385','C8386','C8387','C8388','C8389','C8390','C8391','C8392','C8393','C839',  
, '4','C8395','C8396','C8397','C8398','C8399','C8400','C8401','C8402','C8403','C8404','C8405','C84',  
, '06','C8407','C8408','C8409','C8410','C8411','C8412','C8413','C8414','C8415','C8416','C8417','C8',  
, '418','C8419','C8440','C8441','C8442','C8443','C8444','C8445','C8446','C8447','C8448','C8449','C',  
, '8460','C8461','C8462','C8463','C8464','C8465','C8466','C8467','C8468','C8469','C8470','C8471',  
, 'C8472','C8473','C8474','C8475','C8476','C8477','C8478','C8479','C8490','C8491','C8492','C8493',  
, 'C8494','C8495','C8496','C8497','C8498','C8499','C84A0','C84A1','C84A2','C84A3','C84A4','C84',  
, 'A5','C84A6','C84A7','C84A8','C84A9','C84Z0','C84Z1','C84Z2','C84Z3','C84Z4','C84Z5','C84Z6','C8',  
, '4Z7','C84Z8','C84Z9','C8510','C8511','C8512','C8513','C8514','C8515','C8516','C8517','C8518','C',  
, '8519','C8520','C8521','C8522','C8523','C8524','C8525','C8526','C8527','C8528','C8529','C8580',  
, 'C8581','C8582','C8583','C8584','C8585','C8586','C8587','C8588','C8589','C8590','C8591','C8592',  
, 'C8593','C8594','C8595','C8596','C8597','C8598','C8599','C860','C861','C862','C863','C864','C86',  
, '5','C866','C880','C882','C883','C884','C888','C889','C9000','C9001','C9002','C9010','C9011','C90',  
, '12','C9020','C9021','C9022','C9030','C9031','C9032','C9100','C9101','C9102','C9110','C9111','C9',  
, '112','C9130','C9131','C9132','C9140','C9141','C9142','C9150','C9151','C9152','C9160','C9161','C',  
, '9162','C9190','C9191','C9192','C91A0','C91A1','C91A2','C91Z0','C91Z1','C91Z2','C9200','C9201',  
, 'C9202','C9210','C9211','C9212','C9220','C9221','C9222','C9230','C9231','C9232','C9240','C9241',  
, 'C9242','C9250','C9251','C9252','C9260','C9261','C9262','C9290','C9291','C9292','C92A0','C92A',  
, '1','C92A2','C92Z0','C92Z1','C92Z2','C9300','C9301','C9302','C9310','C9311','C9312','C9330','C93',  
, '31','C9332','C9390','C9391','C9392','C93Z0','C93Z1','C93Z2','C9400','C9401','C9402','C9420','C9',  
, '421','C9422','C9430','C9431','C9432','C9440','C9441','C9442','C946','C9480','C9481','C9482','C9',  
, '500','C9501','C9502','C9510','C9511','C9512','C9590','C9591','C9592','C960','C962','C9620','C96',  
, '21','C9622','C9629','C964','C965','C966','C969','C96A','C96Z','D0000','D0001','D0002','D0003','D',  
, '0004','D0005','D0006','D0007','D0008','D001','D002','D010','D011','D012','D013','D0140','D014',  
, '9','D015','D017','D019','D020','D021','D0220','D0221','D0222','D023','D024','D030','D0310','D0',  
, '311','D03111','D03112','D0312','D03121','D03122','D0320','D0321','D0322','D0330','D0339','D',  
, '034','D0351','D0352','D0359','D0360','D0361','D0362','D0370','D0371','D0372','D038','D039','D',  
, '040','D0410','D0411','D04111','D04112','D0412','D04121','D04122','D0420','D0421','D0422','D',  
, '0430','D0439','D044','D045','D0460','D0461','D0462','D0470','D0471','D0472','D048','D049','D0

500','D0501','D0502','D0510','D0511','D0512','D0580','D0581','D0582','D0590','D0591','D0592',  
'D060','D061','D067','D069','D070','D071','D072','D0730','D0739','D074','D075','D0760','D0761',  
'D0769','D090','D0910','D0919','D0920','D0921','D0922','D093','D098','D099','D3701','D3702',  
'D37030','D37031','D37032','D37039','D3704','D3705','D3709','D371','D372','D373','D374','D37',  
'D375','D376','D378','D379','D380','D381','D382','D383','D384','D385','D386','D390','D3910','D3911',  
'D3912','D392','D398','D399','D400','D4010','D4011','D4012','D408','D409','D4100','D4101','D4',  
'D4102','D4110','D4111','D4112','D4120','D4121','D4122','D413','D414','D418','D419','D420','D421',  
'D429','D430','D431','D432','D433','D434','D438','D439','D440','D4410','D4411','D4412','D442',  
'D443','D444','D445','D446','D447','D449','D460','D461','D4620','D4621','D4622','D464','D469',  
'D46A','D46B','D46C','D46Z','D470','D4701','D4702','D4709','D471','D472','D473','D474','D479',  
'D47Z1','D47Z2','D47Z9','D480','D481','D482','D483','D484','D485','D4860','D4861','D4862','D48',  
'D487','D489','D490','D491','D492','D493','D494','D495','D49511','D49512','D49519','D4959','D496',  
'D497','D4981','D4989','D499','D61810','D61810','D630','D630','D6481','D6481','D701','D701','E',  
'E3122','E3122','E3123','E3123','E883','E883','G131','G131','G731','G731','G893','G893','H4742',  
'H4742','H47521','H47521','H47522','H47522','H47529','H47529','H47631','H47631','H47632','H',  
'H47632','H47639','H47639','H6021','H6022','H6023','J910','J910','K1231','K1231','M360','M360',  
'M361','M361','M8450XA','M8450XA','M84511A','M84511A','M84512A','M84512A','M84519A',  
'M84519A','M84521A','M84521A','M84522A','M84522A','M84529A','M84529A','M84531A','M',  
'84531A','M84532A','M84532A','M84533A','M84533A','M84534A','M84534A','M84539A','M84',  
'539A','M84541A','M84541A','M84542A','M84542A','M84549A','M84549A','M84550A','M8455',  
'0A','M84551A','M84551A','M84552A','M84552A','M84553A','M84553A','M84559A','M84559A',  
'M84561A','M84561A','M84562A','M84562A','M84563A','M84563A','M84564A','M84564A','M',  
'84569A','M84569A','M84571A','M84571A','M84572A','M84572A','M84573A','M84573A','M84',  
'574A','M84574A','M84575A','M84575A','M84576A','M84576A','M8458XA','M8458XA','N5236',  
'N5236','R180','R180','R530','R530','T80810A','T80810A','T80810D','T80810D','T80810S',  
'T8081',  
OS'

Head Injury

F0781','G44301','G44309','G44311','G44319','G44321','G44329','S0100XA','S0100XD','S0101XA  
,','S0101XD','S0102XA','S0102XD','S0103XA','S0103XD','S0104XA','S0104XD','S0105XA','S0105XD  
,','S01101A','S01101D','S01102A','S01102D','S01109A','S01109D','S01111A','S01111D','S01112A  
,','S01112D','S01119A','S01119D','S01121A','S01121D','S01122A','S01122D','S01129A','S01129D  
,','S01131A','S01131D','S01132A','S01132D','S01139A','S01139D','S01141A','S01141D','S01142A  
,','S01142D','S01149A','S01149D','S01151A','S01151D','S01152A','S01152D','S01159A','S01159D  
,','S0120XA','S0120XD','S0121XA','S0121XD','S0122XA','S0122XD','S0123XA','S0123XD','S0124XA  
,','S0124XD','S0125XA','S0125XD','S01301A','S01301D','S01302A','S01302D','S01309A','S01309D  
,','S01311A','S01311D','S01312A','S01312D','S01319A','S01319D','S01321A','S01321D','S01322A  
,','S01322D','S01329A','S01329D','S01331A','S01331D','S01332A','S01332D','S01339A','S01339D  
,','S01341A','S01341D','S01342A','S01342D','S01349A','S01349D','S01351A','S01351D','S01352A  
,','S01352D','S01359A','S01359D','S01401A','S01401D','S01402A','S01402D','S01409A','S01409D  
,','S01411A','S01411D','S01412A','S01412D','S01419A','S01419D','S01421A','S01421D','S01422A  
,','S01422D','S01429A','S01429D','S01431A','S01431D','S01432A','S01432D','S01439A','S01439D  
,','S01441A','S01441D','S01442A','S01442D','S01449A','S01449D','S01451A','S01451D','S01452A  
,','S01452D','S01459A','S01459D','S01501A','S01501D','S01502A','S01502D','S01511A','S01511D  
,','S01512A','S01512D','S01521A','S01521D','S01522A','S01522D','S01531A','S01531D','S01532A  
,','S01532D','S01541A','S01541D','S01542A','S01542D','S01551A','S01551D','S01552A','S01552D  
,','S0180XA','S0180XD','S0181XA','S0181XD','S0182XA','S0182XD','S0183XA','S0183XD','S0184XA  
,','S0184XD','S0185XA','S0185XD','S0190XA','S0190XD','S0191XA','S0191XD','S0192XA','S0192XD  
,','S0193XA','S0193XD','S0194XA','S0194XD','S0195XA','S0195XD','S020XXA','S020XXB','S020XXD  
,','S020XXG','S020XXK','S02101A','S02101B','S02101D','S02101G','S02101K','S02102A','S02102B'  
,','S02102D','S02102G','S02102K','S02109A','S02109B','S02109D','S02109G','S02109K','S0210XA',  
,','S0210XB','S0210XD','S0210XG','S0210XK','S02110A','S02110B','S02110D','S02110G','S02110K',  
,','S02111A','S02111B','S02111D','S02111G','S02111K','S02112A','S02112B','S02112D','S02112G',  
,','S02112K','S02113A','S02113B','S02113D','S02113G','S02113K','S02118A','S02118B','S02118D',  
,','S02118G','S02118K','S02119A','S02119B','S02119D','S02119G','S02119K','S0211AA','S0211AB',  
,','S0211AD','S0211AG','S0211AK','S0211BA','S0211BB','S0211BD','S0211BG','S0211BK','S0211CA',  
,','S0211CB','S0211CD','S0211CG','S0211CK','S0211DA','S0211DB','S0211DD','S0211DG','S0211DK',  
,','S0211EA','S0211EB','S0211ED','S0211EG','S0211EK','S0211FA','S0211FB','S0211FD','S0211FG',  
,','S0211FK','S0211GA','S0211GB','S0211GD','S0211GG','S0211GK','S0211HA','S0211HB','S0211H  
,','S0211HG','S0211HK','S0219XA','S0219XB','S0219XD','S0219XG','S0219XK','S022XXA','S022X  
,','S022XXD','S022XXG','S022XXK','S0230XA','S0230XB','S0230XD','S0230XG','S0230XK','S0231  
,','S0231XA','S0231XB','S0231XD','S0231XG','S0231XK','S0232XA','S0232XB','S0232XD','S0232XG',  
,','S0232XK','S023XXA','S023XXB','S023XXD','S023XXG','S023XXK','S02400A','S02400B','S02400D',  
,','S02400G','S02400K','S02401A','S02401B','S02401D','S02401G','S02401K','S02402A','S02402B',  
,','S02402D','S02402G','S02402K','S0240AA','S0240AB','S0240AD','S0240AG','S0240AK','S0240BA',  
,','S0240BB','S0240BD','S0240BG','S0240BK','S0240CA','S0240CB','S0240CD','S0240CG','S0240CK',  
,','S0240DA','S0240DB','S0240DD','S0240DG','S0240DK','S0240EA','S0240EB','S0240ED','S0240EG',  
,','S0240EK','S0240FA','S0240FB','S0240FD','S0240FG','S0240FK','S02411A','S02411B','S02411D',  
,','S02411G','S02411K','S02412A','S02412B','S02412D','S02412G','S02412K','S02413A','S02413B',  
,','S02413D','S02413G','S02413K','S0242XA','S0242XB','S0242XD','S0242XG','S0242XK','S025XXA',  
,','S025XXB','S025XXD','S025XXG','S025XXK','S02600A','S02600B','S02600D','S02600G','S02600K',  
,','S02601A','S02601B','S02601D','S02601G','S02601K','S02602A','S02602B','S02602D','S02602G',  
,','S02602K','S02609A','S02609B','S02609D',  
,','S02609G','S02609K','S02610A','S02610B','S02610D','S02610G','S02610K','S02611A','S02611B',  
,','S02611D','S02611G','S02611K','S02612A','S02612B','S02612D','S02612G','S02612K','S0261XA',  
,','S0261XB','S0261XD','S0261XG','S0261XK','S02620A','S02620B','S02620D','S02620G','S02620K',  
,','S02621A','S02621B','S02621D','S02621G','S02621K','S02622A','S02622B','S02622D','S02622G',  
,','S02622K','S0262XA','S0262XB','S0262XD','S0262XG','S0262XK','S02630A','S02630B','S02630D',  
,','S02630G','S02630K','S02631A','S02631B','S02631D','S02631G','S02631K','S02632A','S02632B',  
,','S02632D','S02632G','S02632K','S0263XA','S0263XB','S0263XD','S0263XG','S0263XK','S02640A',  
,','S02640B','S02640D','S02640G','S02640K','S02641A','S02641B','S02641D','S02641G','S02641K',



S06895D', 'S06896A', 'S06896D', 'S06897A', 'S06897D', 'S06898A', 'S06898D', 'S06899A', 'S06899D', 'S069X0A', 'S069X0D', 'S069X1A', 'S069X1D', 'S069X2A', 'S069X2D', 'S069X3A', 'S069X3D', 'S069X4A', 'S069X4D', 'S069X5A', 'S069X5D', 'S069X6A', 'S069X6D', 'S069X7A', 'S069X7D', 'S069X8A', 'S069X8D', 'S069X9A', 'S069X9D', 'S080XXA', 'S080XXD', 'S0920XA', 'S0920XD', 'S0921XA', 'S0921XD', 'S0922XA', 'S0922XD', 'S11011A', 'S11011D', 'S11012A', 'S11012D', 'S11013A', 'S11013D', 'S11014A', 'S11014D', 'S11015A', 'S11015D', 'S11019A', 'S11019D', 'S11021A', 'S11021D', 'S11022A', 'S11022D', 'S11023A', 'S11023D', 'S11024A', 'S11024D', 'S11025A', 'S11025D', 'S11029A', 'S11029D', 'S11031A', 'S11031D', 'S11032A', 'S11032D', 'S11033A', 'S11033D', 'S11034A', 'S11034D', 'S11035A', 'S11035D', 'S11039A', 'S11039D', 'S1110XA', 'S1110XD', 'S1111XA', 'S1111XD', 'S1112XA', 'S1112XD', 'S1113XA', 'S1113XD', 'S1114XA', 'S1114XD', 'S1115XA', 'S1115XD', 'S1120XA', 'S1120XD', 'S1121XA', 'S1121XD', 'S1122XA', 'S1122XD', 'S1123XA', 'S1123XD', 'S1124XA', 'S1124XD', 'S1125XA', 'S1125XD', 'S1180XA', 'S1180XD', 'S1181XA', 'S1181XD', 'S1182XA', 'S1182XD', 'S1183XA', 'S1183XD', 'S1184XA', 'S1184XD', 'S1185XA', 'S1185XD', 'S1189XA', 'S1189XD', 'S1190XA', 'S1190XD', 'S1191XA', 'S1191XD', 'S1192XA', 'S1192XD', 'S1193XA', 'S1193XD', 'S1194XA', 'S1194XD', 'S1195XA', 'S1195XD', 'S128XXA', 'S128XXD'

Thyroid Disorder

E000', 'E001', 'E002', 'E009', 'E010', 'E011', 'E012', 'E018', 'E02', 'E030', 'E031', 'E032', 'E033', 'E034', 'E035', 'E038', 'E039', 'E040', 'E041', 'E042', 'E048', 'E049', 'E0500', 'E0501', 'E0510', 'E0511', 'E0520', 'E0521', 'E0530', 'E0531', 'E0540', 'E0541', 'E0580', 'E0581', 'E0590', 'E0591', 'E060', 'E061', 'E062', 'E063', 'E064', 'E065', 'E069', 'E070', 'E071', 'E0781', 'E0789', 'E079', 'E890', 'A1881', 'B6731', 'O905'

Cardiovascular  
Disease

D8685', 'I010', 'I011', 'I012', 'I018', 'I019', 'I020', 'I050', 'I051', 'I052', 'I058', 'I059', 'I060', 'I061', 'I062', 'I068', 'I069', 'I070', 'I071', 'I072', 'I078', 'I079', 'I080', 'I081', 'I082', 'I083', 'I088', 'I089', 'I090', 'I091', 'I092', 'I0981', 'I0989', 'I099', 'I200', 'I201', 'I208', 'I209', 'I240', 'I248', 'I249', 'I2510', 'I25110', 'I25111', 'I25118', 'I25119', 'I252', 'I253', 'I2541', 'I255', 'I256', 'I25700', 'I25701', 'I25708', 'I25709', 'I25710', 'I25711', 'I25718', 'I25719', 'I25720', 'I25721', 'I25728', 'I25729', 'I25730', 'I25731', 'I25738', 'I25739', 'I25750', 'I25751', 'I25758', 'I25759', 'I25760', 'I25761', 'I25768', 'I25769', 'I25790', 'I25791', 'I25798', 'I25799', 'I25810', 'I25811', 'I25812', 'I2582', 'I2583', 'I2584', 'I2589', 'I259', 'I270', 'I271', 'I272', 'I2720', 'I2721', 'I2722', 'I2723', 'I2724', 'I2729', 'I2781', 'I2782', 'I2783', 'I2789', 'I279', 'I280', 'I281', 'I288', 'I289', 'I300', 'I301', 'I308', 'I309', 'I310', 'I311', 'I312', 'I313', 'I314', 'I318', 'I319', 'I32', 'I330', 'I339', 'I340', 'I341', 'I342', 'I348', 'I349', 'I350', 'I351', 'I352', 'I358', 'I359', 'I360', 'I361', 'I362', 'I368', 'I369', 'I370', 'I371', 'I372', 'I378', 'I379', 'I38', 'I39', 'I400', 'I401', 'I408', 'I409', 'I41', 'I420', 'I421', 'I422', 'I423', 'I424', 'I425', 'I426', 'I427', 'I428', 'I429', 'I43', 'I440', 'I441', 'I442', 'I4430', 'I4439', 'I444', 'I445', 'I4460', 'I4469', 'I447', 'I450', 'I4510', 'I4519', 'I452', 'I453', 'I454', 'I455', 'I456', 'I4581', 'I4589', 'I459', 'I462', 'I501', 'I5020', 'I5021', 'I5022', 'I5023', 'I5030', 'I5031', 'I5032', 'I5033', 'I5040', 'I5041', 'I5042', 'I5043', 'I50810', 'I50811', 'I50812', 'I50813', 'I50814', 'I5082', 'I5083', 'I5084', 'I5089', 'I509', 'I510', 'I511', 'I512', 'I513', 'I514', 'I515', 'I517', 'I5181', 'I5189', 'I519', 'I52', 'I700', 'I701', 'I70201', 'I70202', 'I70203', 'I70208', 'I70209', 'I70211', 'I70212', 'I70213', 'I70218', 'I70219', 'I70221', 'I70222', 'I70223', 'I70228', 'I70229', 'I70231', 'I70232', 'I70233', 'I70234', 'I70235', 'I70238', 'I70239', 'I70241', 'I70242', 'I70243', 'I70244', 'I70245', 'I70248', 'I70249', 'I7025', 'I70261', 'I70262', 'I70263', 'I70268', 'I70269', 'I70291', 'I70292', 'I70293', 'I70298', 'I70299', 'I70301', 'I70302', 'I70303', 'I70308', 'I70309', 'I70311', 'I70312', 'I70313', 'I70318', 'I70319', 'I70321', 'I70322', 'I70323', 'I70328', 'I70329', 'I70331', 'I70332', 'I70333', 'I70334', 'I70335', 'I70338', 'I70339', 'I70341', 'I70342', 'I70343', 'I70344', 'I70345', 'I70348', 'I70349', 'I7035', 'I70361', 'I70362', 'I70363', 'I70368', 'I70369', 'I70391', 'I70392', 'I70393', 'I70398', 'I70399', 'I70401', 'I70402', 'I70403', 'I70408', 'I70409', 'I70411', 'I70412', 'I70413', 'I70418', 'I70419', 'I70421', 'I70422', 'I70423', 'I70428', 'I70429', 'I70431', 'I70432', 'I70433', 'I70434', 'I70435', 'I70438', 'I70439', 'I70441', 'I70442', 'I70443', 'I70444', 'I70445', 'I70448', 'I70449', 'I7045', 'I70461', 'I70462', 'I70463', 'I70468', 'I70469', 'I70491', 'I70492', 'I70493', 'I70498', 'I70499', 'I70501', 'I70502', 'I70503', 'I70508', 'I70509', 'I70511', 'I70512', 'I70513', 'I70518', 'I70519', 'I70521', 'I70522', 'I70523', 'I70528', 'I70529', 'I70531', 'I70532', 'I70533', 'I70534', 'I70535', 'I70538', 'I70539', 'I70541', 'I70542', 'I70543', 'I70544', 'I70545', 'I70548', 'I70549', 'I7055', 'I70561', 'I70562', 'I70563', 'I70568', 'I70569', 'I70591', 'I70592', 'I70593', 'I70598', 'I70599', 'I70601', 'I70602', 'I70603', 'I70608', 'I70609', 'I70611', 'I70612', 'I70613', 'I70618', 'I70619', 'I70621', 'I70622', 'I70623', 'I70628', 'I70629', 'I70631', 'I70632', 'I70633', 'I70634', 'I70635', 'I70638', 'I70639', 'I70641', 'I70642', 'I70643', 'I70644', 'I70645', 'I70648', 'I70649', 'I7065', 'I70661', 'I70662', 'I70663', 'I70668', 'I70669', 'I70691', 'I70692', 'I70693', 'I70698', 'I70699', 'I70701', 'I70702', 'I70703', 'I70708', 'I70709', 'I70711', 'I70712', 'I70713', 'I70718', 'I70719', 'I70721', 'I70722', 'I70723', 'I70728', 'I70729', 'I70731', 'I70732', 'I70733', 'I70734', 'I70735', 'I70738', 'I70739', 'I70741', 'I70742', 'I70743', 'I70744', 'I70745', 'I70748', 'I70749', 'I7075', 'I70761', 'I70762', 'I70763', 'I70768', 'I70769', 'I70791', 'I70792', 'I70793', 'I70798', 'I70799', 'I708', 'I7090', 'I7091', 'I7092', 'I7300', 'I7301', 'I731', 'I7381', 'I7389', 'I739', 'I770', 'I771', 'I772', 'I773', 'I774', 'I775', 'I776', 'I77810', 'I77811', 'I77812', 'I77819', 'I7789', 'I779', 'I780', 'I781', 'I788', 'I789', 'I791', 'I798', 'I97110', 'I97120', 'I97130', 'I97131', 'I97190', 'I97410', 'I97411', 'I97610', 'I97611', 'I97630', 'I97631', 'I97640', 'I97641', 'I97710', 'I97790', 'I998', 'I999', 'P294', 'P2989', 'P299', 'Q200', 'Q201', 'Q202', 'Q203', 'Q204', 'Q205', 'Q206', 'Q208', 'Q209', 'Q210', 'Q211', 'Q212', 'Q213', 'Q214', 'Q218', 'Q219', 'Q220', 'Q221', 'Q222', 'Q223', 'Q224', 'Q225', 'Q226', 'Q228', 'Q229', 'Q230', 'Q231', 'Q232', 'Q233', 'Q234', 'Q238', 'Q239', 'Q240', 'Q241', 'Q242', 'Q243', 'Q244', 'Q245', 'Q246', 'Q248', 'Q249', 'Q250', 'Q251', 'Q252', 'Q2521', 'Q2529', 'Q253', 'Q254', 'Q2540', 'Q2541', 'Q2542', 'Q2543', 'Q2544', 'Q2545', 'Q2546', 'Q2547', 'Q2548', 'Q2549', 'Q255', 'Q256', 'Q2571', 'Q2572', 'Q2579', 'Q258', 'Q259', 'Q260', 'Q261', 'Q262', 'Q263', 'Q264', 'Q265', 'Q266', 'Q268', 'Q269', 'Q270', 'Q271', 'Q272', 'Q2730', 'Q2731', 'Q2732', 'Q2733', 'Q2734', 'Q2739', 'Q274', 'Q278', 'Q279', 'Q280', 'Q281', 'Q282', 'Q283',

'Q288', 'Q289', 'Q87418', 'T81505S', 'T81515S', 'T81525S', 'T81535S', 'T81595S', 'T81710S',  
'T81711S', 'T81718S', 'T81719S', 'T8172XS', 'T8201XA', 'T8201XD', 'T8201XS', 'T8202XA',  
'T8202XD', 'T8202XS', 'T8203XA', 'T8203XD', 'T8203XS', 'T8209XA', 'T8209XD', 'T8209XS',  
'T82110A', 'T82110D', 'T82110S', 'T82111A', 'T82111D', 'T82111S', 'T82118A', 'T82118D',  
'T82118S', 'T82119A', 'T82119D', 'T82119S', 'T82120A', 'T82120D', 'T82120S', 'T82121A',  
'T82121D', 'T82121S', 'T82128A', 'T82128D', 'T82128S', 'T82129A', 'T82129D', 'T82129S',  
'T82190A', 'T82190D', 'T82190S', 'T82191A', 'T82191D', 'T82191S', 'T82198A', 'T82198D',  
'T82198S', 'T82199A', 'T82199D', 'T82199S', 'T82211A', 'T82211D', 'T82211S', 'T82212A',  
'T82212D', 'T82212S', 'T82213A', 'T82213D', 'T82213S', 'T82218A', 'T82218D', 'T82218S',  
'T82221A', 'T82221D', 'T82221S', 'T82222A', 'T82222D', 'T82222S', 'T82223A', 'T82223D',  
'T82223S', 'T82228A', 'T82228D', 'T82228S', 'T82310A', 'T82310D', 'T82310S', 'T82311A',  
'T82311D', 'T82311S', 'T82312A', 'T82312D', 'T82312S', 'T82318A', 'T82318D', 'T82318S',  
'T82319A', 'T82319D', 'T82319S', 'T82320A', 'T82320D', 'T82320S', 'T82321A', 'T82321D',  
'T82321S', 'T82322A', 'T82322D', 'T82322S', 'T82328A', 'T82328D', 'T82328S', 'T82329A',  
'T82329D', 'T82329S', 'T82330A', 'T82330D', 'T82330S', 'T82331A', 'T82331D', 'T82331S',  
'T82332A', 'T82332D', 'T82332S', 'T82338A', 'T82338D', 'T82338S', 'T82339A', 'T82339D',  
'T82339S', 'T82390A', 'T82390D', 'T82390S', 'T82391A', 'T82391D', 'T82391S', 'T82392A',  
'T82392D', 'T82392S', 'T82398A', 'T82398D', 'T82398S', 'T82399A', 'T82399D', 'T82399S',  
'T8241XA', 'T8241XD', 'T8242XA', 'T8242XD', 'T8243XA', 'T8243XD', 'T8249XA', 'T8249XD',  
'T82510A', 'T82510D', 'T82510S', 'T82511A', 'T82511D', 'T82511S', 'T82512A', 'T82512D',  
'T82512S', 'T82513A', 'T82513D', 'T82514A', 'T82514D', 'T82515A', 'T82515D', 'T82518A',  
'T82518D', 'T82518S', 'T82519A', 'T82519D', 'T82519S', 'T82520A', 'T82520D', 'T82520S',  
'T82521A', 'T82521D', 'T82521S', 'T82522A', 'T82522D', 'T82522S', 'T82523A', 'T82523D',  
'T82524A', 'T82524D', 'T82525A', 'T82525D', 'T82528A', 'T82528D', 'T82528S', 'T82529A',  
'T82529D', 'T82529S', 'T82530A', 'T82530D', 'T82530S', 'T82531A', 'T82531D', 'T82531S',  
'T82532A', 'T82532D', 'T82532S', 'T82533A', 'T82533D', 'T82534A', 'T82534D', 'T82535A',  
'T82535D', 'T82538A', 'T82538D', 'T82538S', 'T82539A', 'T82539D', 'T82539S', 'T82590A',  
'T82590D', 'T82590S', 'T82591A', 'T82591D', 'T82591S', 'T82592A', 'T82592D', 'T82592S',  
'T82593A', 'T82593D', 'T82594A', 'T82594D', 'T82595A', 'T82595D', 'T82598A', 'T82598D',  
'T82598S', 'T82599A', 'T82599D', 'T82599S', 'T82817A', 'T82817D', 'T82817S', 'T82818A',  
'T82818D', 'T82818S', 'T82827A', 'T82827D', 'T82827S', 'T82828A', 'T82828D', 'T82828S',  
'T82837A', 'T82837D', 'T82837S', 'T82838A', 'T82838D', 'T82838S', 'T82847A', 'T82847D',  
'T82847S', 'T82848A', 'T82848D', 'T82848S', 'T82855A', 'T82855D', 'T82855S', 'T82856A',  
'T82856D', 'T82856S', 'T82857A', 'T82857D', 'T82857S', 'T82858A', 'T82858D', 'T82858S',  
'T82867A', 'T82867D', 'T82867S', 'T82868A', 'T82868D', 'T82868S', 'T82897A', 'T82897D',  
'T82897S', 'T82898A', 'T82898D', 'T82898S', 'T829XXA', 'T829XXD', 'T829XXS', 'T8620', 'T8621',  
'T8622', 'T86290', 'T86298', 'T8630', 'T8631', 'T8632', 'T8639', 'Y710', 'Y711', 'Y712', 'Y713',  
'Y718', 'Y840', 'Z45010', 'Z45018', 'Z950', 'Z951', 'Z952', 'Z953', 'Z954', 'Z955', 'Z95811',  
'Z95812', 'Z95820', 'Z9862',  
, 'A1884', 'A3282', 'A3681', 'A381', 'A3950', 'A3951', 'A3952', 'A3953', 'A5200', 'A5202', 'A5203', 'A520  
6', 'A5209', 'A5483', 'B2682', 'B3320', 'B3321', 'B3322', 'B3323', 'B3324', 'B376', 'B570', 'B572', 'B5881',  
'C380', 'C381', 'C382', 'C383', 'C388', 'E0851', 'E0951', 'E1051', 'E1151', 'E1351', 'I00', 'J1082', 'J1182',  
'M0530', 'M05311', 'M05312', 'M05319', 'M05321', 'M05322', 'M05329', 'M05331', 'M05332', 'M053  
39', 'M05341', 'M05342', 'M05349', 'M05351', 'M05352', 'M05359', 'M05361', 'M05362', 'M05369',  
'M05371', 'M05372', 'M05379', 'M0539', 'M3211', 'M3212', 'O29121', 'O29122', 'O29123', 'O29129',  
'O903', 'T826XXA', 'T826XXD', 'T826XXS', 'T827XXA', 'T827XXD', 'T827XXS', 'T8623', 'T8633', 'E0852',  
'E0952', 'E1052', 'E1152', 'E1352'



|                                                                        |                                                                                                                                                                                                                                                                                                                                                                                                                                                                                                                                                                                                                                                                                                                                                                                                                                                                                                                                                                                                     |
|------------------------------------------------------------------------|-----------------------------------------------------------------------------------------------------------------------------------------------------------------------------------------------------------------------------------------------------------------------------------------------------------------------------------------------------------------------------------------------------------------------------------------------------------------------------------------------------------------------------------------------------------------------------------------------------------------------------------------------------------------------------------------------------------------------------------------------------------------------------------------------------------------------------------------------------------------------------------------------------------------------------------------------------------------------------------------------------|
| Hypertension                                                           | H35031,'H35032','H35033','I10','I110','I119','I120','I129','I130','I1310','I1311','I132','I150','I151','I152','I158','I159','I160','I161','I169','I674','I973','O10011','O10012','O10013','O10019','O1002','O1003','O10111','O10112','O10113','O10119','O1012','O1013','O10211','O10212','O10213','O10219','O1022','O1023','O10311','O10312','O10313','O10319','O1032','O1033','O10411','O10412','O10413','O10419','O1042','O1043','O10911','O10912','O10913','O10919','O1092','O1093','O111','O112','O113','O114','O115','O119','O131','O132','O133','O134','O135','O139','O1400','O1402','O1403','O1410','O1412','O1413','O1420','O1422','O1423','O1490','O1492','O1493','O1500','O1502','O1503','O159','O161','O162','O163','O164','O165','O169','P292','O1404','O1405','O1414','O1415','O1424','O1425','O1494','O1495','O151','O152'                                                                                                                                                            |
| Obesity                                                                | E6601,'E6609','E661','E662','E668','E669','Z6830','Z6831','Z6832','Z6833','Z6834','Z6835','Z6836','Z6837','Z6838','Z6839','Z6841','Z6842','Z6843','Z6844','Z6845','Z6854','O99210','O99211','O99212','O99213','O99214','O99215'                                                                                                                                                                                                                                                                                                                                                                                                                                                                                                                                                                                                                                                                                                                                                                     |
| Type 2 Diabetes                                                        | E1100,'E1101','E1110','E1111','E1121','E1122','E1129','E11311','E11319','E11321','E113211','E113212','E113213','E113219','E11329','E113291','E113292','E113293','E113299','E11331','E113311','E113312','E113313','E113319','E11339','E113391','E113392','E113393','E113399','E11341','E113411','E113412','E113413','E113419','E11349','E113491','E113492','E113493','E113499','E11351','E113511','E113512','E113513','E113519','E113521','E113522','E113523','E113529','E113531','E113532','E113533','E113539','E113541','E113542','E113543','E113549','E113551','E113552','E113553','E113559','E11359','E113591','E113592','E113593','E113599','E1136','E1137X1','E1137X2','E1137X3','E1137X9','E1139','E1140','E1141','E1142','E1143','E1144','E1149','E1151','E1152','E1159','E11610','E11618','E11620','E11621','E11622','E11628','E11630','E11638','E11641','E11649','E1165','E1169','E118','E119','E1337X1','E1337X2','E1337X3','E1337X9','O24111','O24112','O24113','O24119','O2412','O2413' |
| Hemorrhagic Disorder                                                   | D66,'D67','D680','D681','D682','D68311','D68312','D68318','D684','D688','D689','D691','D692','D698','D699','M362','M363','N920','N921','N922','N923','P53','P616','P618','P619'                                                                                                                                                                                                                                                                                                                                                                                                                                                                                                                                                                                                                                                                                                                                                                                                                     |
| Systemic lupus erythematosus (SLE) or Other Connective Tissue Disorder | H01121','H01122','H01123','H01124','H01125','H01126','H01129','L4053','L930','L931','L932','M300','M301','M302','M303','M308','M310','M311','M312','M3130','M3131','M314','M315','M316','M317','M318','M319','M320','M3210','M3211','M3212','M3213','M3214','M3215','M3219','M328','M329','M3300','M3301','M3302','M3303','M3309','M3310','M3311','M3312','M3313','M3319','M3320','M3321','M3322','M3329','M3390','M3391','M3392','M3393','M3399','M340','M341','M342','M3481','M3482','M3483','M3489','M349','M3500','M3501','M3502','M3503','M3504','M3509','M351','M352','M353','M354','M355','M356','M357','M358','M359','M360','M368'                                                                                                                                                                                                                                                                                                                                                          |
| Heparin induced thrombocytopenia                                       | 'D7582'                                                                                                                                                                                                                                                                                                                                                                                                                                                                                                                                                                                                                                                                                                                                                                                                                                                                                                                                                                                             |

|                                        |                                                                                                                                                                                                                                                                                                                                                                                                                                                                                                                                                                                                                                                                                                                                                                                                                                                                                                                                                                                                                                                                                                                                                                                                                                                                                                                                                                                                                                                                                                                                                                                                                                                                                                                                                                                                                                                                                                                                                                                                                                                                                                                                                                                                                                                                                                                                                                                                                                                                                                                                                                                                                                                                                                                                                                                                                                                                                                                                                                                                                                                                                                                                                                                                                                                                                                                                                                                                                                                                                                                                                                                                                                                                                                                                   |
|----------------------------------------|-----------------------------------------------------------------------------------------------------------------------------------------------------------------------------------------------------------------------------------------------------------------------------------------------------------------------------------------------------------------------------------------------------------------------------------------------------------------------------------------------------------------------------------------------------------------------------------------------------------------------------------------------------------------------------------------------------------------------------------------------------------------------------------------------------------------------------------------------------------------------------------------------------------------------------------------------------------------------------------------------------------------------------------------------------------------------------------------------------------------------------------------------------------------------------------------------------------------------------------------------------------------------------------------------------------------------------------------------------------------------------------------------------------------------------------------------------------------------------------------------------------------------------------------------------------------------------------------------------------------------------------------------------------------------------------------------------------------------------------------------------------------------------------------------------------------------------------------------------------------------------------------------------------------------------------------------------------------------------------------------------------------------------------------------------------------------------------------------------------------------------------------------------------------------------------------------------------------------------------------------------------------------------------------------------------------------------------------------------------------------------------------------------------------------------------------------------------------------------------------------------------------------------------------------------------------------------------------------------------------------------------------------------------------------------------------------------------------------------------------------------------------------------------------------------------------------------------------------------------------------------------------------------------------------------------------------------------------------------------------------------------------------------------------------------------------------------------------------------------------------------------------------------------------------------------------------------------------------------------------------------------------------------------------------------------------------------------------------------------------------------------------------------------------------------------------------------------------------------------------------------------------------------------------------------------------------------------------------------------------------------------------------------------------------------------------------------------------------------------|
| Disseminated intravascular coagulation | 'D65','P60'                                                                                                                                                                                                                                                                                                                                                                                                                                                                                                                                                                                                                                                                                                                                                                                                                                                                                                                                                                                                                                                                                                                                                                                                                                                                                                                                                                                                                                                                                                                                                                                                                                                                                                                                                                                                                                                                                                                                                                                                                                                                                                                                                                                                                                                                                                                                                                                                                                                                                                                                                                                                                                                                                                                                                                                                                                                                                                                                                                                                                                                                                                                                                                                                                                                                                                                                                                                                                                                                                                                                                                                                                                                                                                                       |
| Antiphospholipid syndrome              | 'D6861'                                                                                                                                                                                                                                                                                                                                                                                                                                                                                                                                                                                                                                                                                                                                                                                                                                                                                                                                                                                                                                                                                                                                                                                                                                                                                                                                                                                                                                                                                                                                                                                                                                                                                                                                                                                                                                                                                                                                                                                                                                                                                                                                                                                                                                                                                                                                                                                                                                                                                                                                                                                                                                                                                                                                                                                                                                                                                                                                                                                                                                                                                                                                                                                                                                                                                                                                                                                                                                                                                                                                                                                                                                                                                                                           |
| Paroxysmal nocturnal hemoglobinuria    | 'D595'                                                                                                                                                                                                                                                                                                                                                                                                                                                                                                                                                                                                                                                                                                                                                                                                                                                                                                                                                                                                                                                                                                                                                                                                                                                                                                                                                                                                                                                                                                                                                                                                                                                                                                                                                                                                                                                                                                                                                                                                                                                                                                                                                                                                                                                                                                                                                                                                                                                                                                                                                                                                                                                                                                                                                                                                                                                                                                                                                                                                                                                                                                                                                                                                                                                                                                                                                                                                                                                                                                                                                                                                                                                                                                                            |
| Thrombotic thrombocytopenic purpura    | 'D693'                                                                                                                                                                                                                                                                                                                                                                                                                                                                                                                                                                                                                                                                                                                                                                                                                                                                                                                                                                                                                                                                                                                                                                                                                                                                                                                                                                                                                                                                                                                                                                                                                                                                                                                                                                                                                                                                                                                                                                                                                                                                                                                                                                                                                                                                                                                                                                                                                                                                                                                                                                                                                                                                                                                                                                                                                                                                                                                                                                                                                                                                                                                                                                                                                                                                                                                                                                                                                                                                                                                                                                                                                                                                                                                            |
| Hemolytic uremic syndrome              | 'D593'                                                                                                                                                                                                                                                                                                                                                                                                                                                                                                                                                                                                                                                                                                                                                                                                                                                                                                                                                                                                                                                                                                                                                                                                                                                                                                                                                                                                                                                                                                                                                                                                                                                                                                                                                                                                                                                                                                                                                                                                                                                                                                                                                                                                                                                                                                                                                                                                                                                                                                                                                                                                                                                                                                                                                                                                                                                                                                                                                                                                                                                                                                                                                                                                                                                                                                                                                                                                                                                                                                                                                                                                                                                                                                                            |
| Renal Disease                          | D631,'D631','K9183','N000','N001','N002','N003','N004','N005','N006','N007','N008','N009','N010','N011','N012','N013','N014','N015','N016','N017','N018','N019','N020','N020','N021','N021','N022','N022','N023','N023','N024','N024','N025','N025','N026','N026','N027','N027','N028','N028','N029','N029','N030','N031','N032','N033','N034','N035','N036','N037','N038','N039','N040','N041','N042','N043','N044','N045','N046','N047','N048','N049','N050','N051','N052','N053','N054','N055','N056','N057','N058','N059','N060','N060','N061','N061','N062','N062','N063','N063','N064','N064','N065','N065','N066','N066','N067','N067','N068','N068','N069','N069','N070','N071','N072','N073','N074','N075','N076','N077','N078','N079','N08','N130','N131','N1330','N1339','N134','N135','N138','N139','N140','N140','N141','N141','N142','N142','N143','N143','N144','N144','N150','N158','N159','N16','N170','N171','N172','N178','N179','N181','N182','N183','N184','N185','N186','N189','N19','N23','N250','N251','N2581','N2589','N259','N261','N262','N269','N270','N271','N279','N280','N281','N2881','N2882','N2883','N2884','N2885','N2886','N2889','N289','N29','N990','N990','P960','Q600','Q601','Q602','Q603','Q604','Q605','Q6119','Q612','Q613','Q614','Q615','Q618','Q619','Q620','Q6239','Q638','Q639','R800','R801','R802','R803','R808','R809','R880','R880','T81502A','T81502D','T81502S','T81512A','T81512D','T81512S','T81522A','T81522D','T81522S','T81532A','T81532D','T81532S','T81592A','T81592D','T81592S','T8241XS','T8242XS','T8243XS','T8249XS','T85611A','T85611D','T85611S','T85621A','T85621D','T85621S','T85631A','T85631D','T85631S','T85691A','T85691D','T85691S','T8610','T8611','T8612','T8619','Y622','Y841','Z4901','Z4901','Z4902','Z4902','Z4931','Z4931','Z4932','Z4932','A1811','A1811','A3684','A3684','A5144','A5144','A5421','A5421','B2683','B2683','B520','B520','B5883','B5883','C641','C642','C649','C651','C652','C659','C7900','C7901','C7902','C7A093','D4101','D4102','D4110','D4111','D4112','D4112','D49511','D49512','D49519','E0821','E0821','E0821','E0822','E0822','E0822','E0829','E0829','E0921','E0921','E0921','E0922','E0922','E0922','E0929','E0929','E1021','E1021','E1021','E1022','E1022','E1022','E1029','E1029','E1121','E1121','E1121','E1122','E1122','E1122','E1129','E1129','E1321','E1321','E1321','E1322','E1322','E1322','E1329','E1329','I120','I120','I129','I129','I130','I130','I130','I1310','I1310','I1311','I1311','I132','I132','I132','M1030','M10311','M10312','M10319','M10321','M10322','M10329','M10331','M10332','M10339','M10341','M10342','M10349','M10351','M10352','M10359','M10361','M10362','M10369','M10371','M10372','M10379','M1038','M1039','M1A30X0','M1A30X1','M1A3110','M1A3111','M1A3120','M1A3121','M1A3190','M1A3191','M1A3210','M1A3211','M1A3220','M1A3221','M1A3290','M1A3291','M1A3310','M1A3311','M1A3320','M1A3321','M1A3390','M1A3391','M1A3410','M1A3411','M1A3420','M1A3421','M1A3490','M1A3491','M1A3510','M1A3511','M1A3520','M1A3521','M1A3590','M1A3591','M1A3610','M1A3611','M1A3620','M1A3621','M1A3690','M1A3691','M1A3710','M1A3711','M1A3720','M1A3721','M1A3790','M1A3791','M1A38X0','M1A38X1','M1A39X0','M1A39X1','N10','N110','N111','N118','N119','N12','N136','N151','O0332','O0382','O0482','O0732','O084','O1210','O1210','O1211','O1211','O1212','O1212','O1213','O1213','O1214','O1214','O1215','O1215','O1220','O1220','O1221','O1221','O1222','O1222','O1223','O1223','O1224','O1224','O1225','O1225','O26831','O26831','O26832','O26832','O26833','O26833','O26839','O26839','O904','O904','T81711S','T8571XA','T8571XD','T8571XS','T8613','O1022','O1022','O1022','O1023','O |

1023','O1023','O1032','O1032','O1032','O1033','O1033','O1033','O2300','O2300','O2301','O2301','O2302','O2302','O2303','O2303','O8621','O8621'

Liver Disease

E8021', 'E804', 'K700', 'K700', 'K7010', 'K7010', 'K7011', 'K7011', 'K702', 'K702', 'K7030', 'K7030', 'K7031', 'K7031', 'K7040', 'K7040', 'K7041', 'K7041', 'K7041', 'K7041', 'K709', 'K709', 'K710', 'K710', 'K7110', 'K7110', 'K7111', 'K7111', 'K7111', 'K712', 'K712', 'K713', 'K713', 'K714', 'K714', 'K7150', 'K7150', 'K7151', 'K7151', 'K716', 'K716', 'K717', 'K717', 'K718', 'K718', 'K719', 'K719', 'K7200', 'K7201', 'K7201', 'K7210', 'K7211', 'K7211', 'K7290', 'K7291', 'K7291', 'K730', 'K731', 'K732', 'K738', 'K739', 'K740', 'K741', 'K742', 'K743', 'K744', 'K745', 'K7460', 'K7469', 'K751', 'K752', 'K753', 'K754', 'K7581', 'K7589', 'K759', 'K760', 'K761', 'K762', 'K763', 'K764', 'K765', 'K766', 'K767', 'K7681', 'K7689', 'K769', 'K77', 'K9182', 'K9182', 'P7881', 'P7884', 'Q446', 'Q447', 'T8640', 'T8641', 'T8642', 'T8649', 'A5145', 'A5145', 'A5274', 'A5274', 'B0081', 'B0081', 'B150', 'B150', 'B150', 'B159', 'B159', 'B160', 'B160', 'B160', 'B161', 'B161', 'B162', 'B162', 'B162', 'B162', 'B169', 'B169', 'B170', 'B170', 'B1710', 'B1710', 'B1711', 'B1711', 'B1711', 'B172', 'B172', 'B178', 'B178', 'B179', 'B179', 'B180', 'B180', 'B181', 'B181', 'B182', 'B182', 'B188', 'B188', 'B189', 'B189', 'B190', 'B190', 'B190', 'B1910', 'B1910', 'B1911', 'B1911', 'B1911', 'B1920', 'B1920', 'B1921', 'B1921', 'B1921', 'B199', 'B199', 'B251', 'B251', 'B2681', 'B2681', 'B581', 'B581', 'B670', 'B670', 'B675', 'B675', 'C220', 'C221', 'C222', 'C223', 'C224', 'C227', 'C228', 'C229', 'C787', 'C7B02', 'K750', 'K9183', 'O26611', 'O26611', 'O26612', 'O26612', 'O26613', 'O26613', 'O26619', 'O26619', 'O2662', 'O2662', 'O2663', 'O2663', 'P353', 'P353', 'T8643', 'O98411', 'O98411', 'O98412', 'O98412', 'O98413', 'O98413', 'O98419', 'O98419', 'O9842', 'O9842', 'O9843', 'O9843'

**Supplemental Table 2: Gender- and age group-specific prevalence of co-occurring conditions among inpatient admissions, overall and among persons hospitalized for cerebral venous sinus thrombosis (CVST), in the Healthcare Cost and Utilization (HCUP), 2018 National Inpatient Sample (NIS)**

|                           | <b>General Inpatient Population<br/>Weighted N=35,527,481<br/>Weighted % (95% CI)</b> | <b>CVST<sup>b</sup><br/>Weighted N=9,310<br/>Weighted % (95% CI)</b> |
|---------------------------|---------------------------------------------------------------------------------------|----------------------------------------------------------------------|
| <b>Hemorrhagic Stroke</b> |                                                                                       |                                                                      |
| Male, 18-49 Years         | 0.6 (0.6 - 0.7)                                                                       | 17.1 (12.6 - 21.5)                                                   |
| Female, 18-49 Years       | 0.2 (0.2 - 0.2)                                                                       | 18.4 (15.1 - 21.7)                                                   |
| Male, 50+ Years           | 1.2 (1.2 - 1.3)                                                                       | 20.6 (16.5 - 24.7)                                                   |
| Female, 50+ Years         | 1.0 (1.0 - 1.1)                                                                       | 22.1 (18.0 - 26.2)                                                   |
| <b>Ischemic Stroke</b>    |                                                                                       |                                                                      |
| Male, 18-49 Years         | 2.1 (2.0 - 2.2)                                                                       | 19.7 (14.7 - 24.7)                                                   |
| Female, 18-49 Years       | 0.9 (0.9 - 1.0)                                                                       | 22.0 (18.5 - 25.4)                                                   |
| Male, 50+ Years           | 9.0 (8.9 - 9.1)                                                                       | 31.6 (26.9 - 36.3)                                                   |
| Female, 50+ Years         | 8.2 (8.1 - 8.3)                                                                       | 32.7 (28.1 - 37.3)                                                   |
| <b>Other VTE</b>          |                                                                                       |                                                                      |
| Male, 18-49 Years         | 2.6 (2.5 - 2.6)                                                                       | 21.6 (16.7 - 26.5)                                                   |
| Female, 18-49 Years       | 1.2 (1.2 - 1.3)                                                                       | 15.6 (12.4 - 18.8)                                                   |
| Male, 50+ Years           | 3.3 (3.2 - 3.3)                                                                       | 18.4 (14.4 - 22.5)                                                   |
| Female, 50+ Years         | 3.0 (2.9 - 3.0)                                                                       | 15.6 (12.1 - 19.1)                                                   |

<sup>a</sup>International Classification of Disease, tenth revision, clinical modification codes indicating co-occurring condition listed anywhere on inpatient claim record.

<sup>b</sup>Among individuals with International Classification of Disease, tenth revision, clinical modification code for CVST listed anywhere on inpatient claim record.
